# Supplementary material for: The anaerobic corrosion of the carbon steel overpack under anoxic alkaline conditions representing the Belgian supercontainer concept
Source: Copernicus journal article supplement (doi:10.5194/sand-2-41-2023), 2023-09-06
Supplement: Supplementary file 1 [file sand-2-41-2023-supplement.pdf]

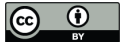

*Supplement of*

## **The anaerobic corrosion of the carbon steel overpack under anoxic alkaline conditions representing the Belgian supercontainer concept**

**Roberto Gaggiano**

*Correspondence to:* Roberto Gaggiano (r.gaggiano@nirond.be)

The copyright of individual parts of the supplement might differ from the article licence.

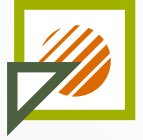

**ONDRAF/NIRAS**

**The anaerobic  
corrosion of the  
carbon steel overpack  
under anoxic alkaline  
conditions  
representing the  
Belgian  
supercontainer  
concept**

R. Gaggiano

12/09/2023

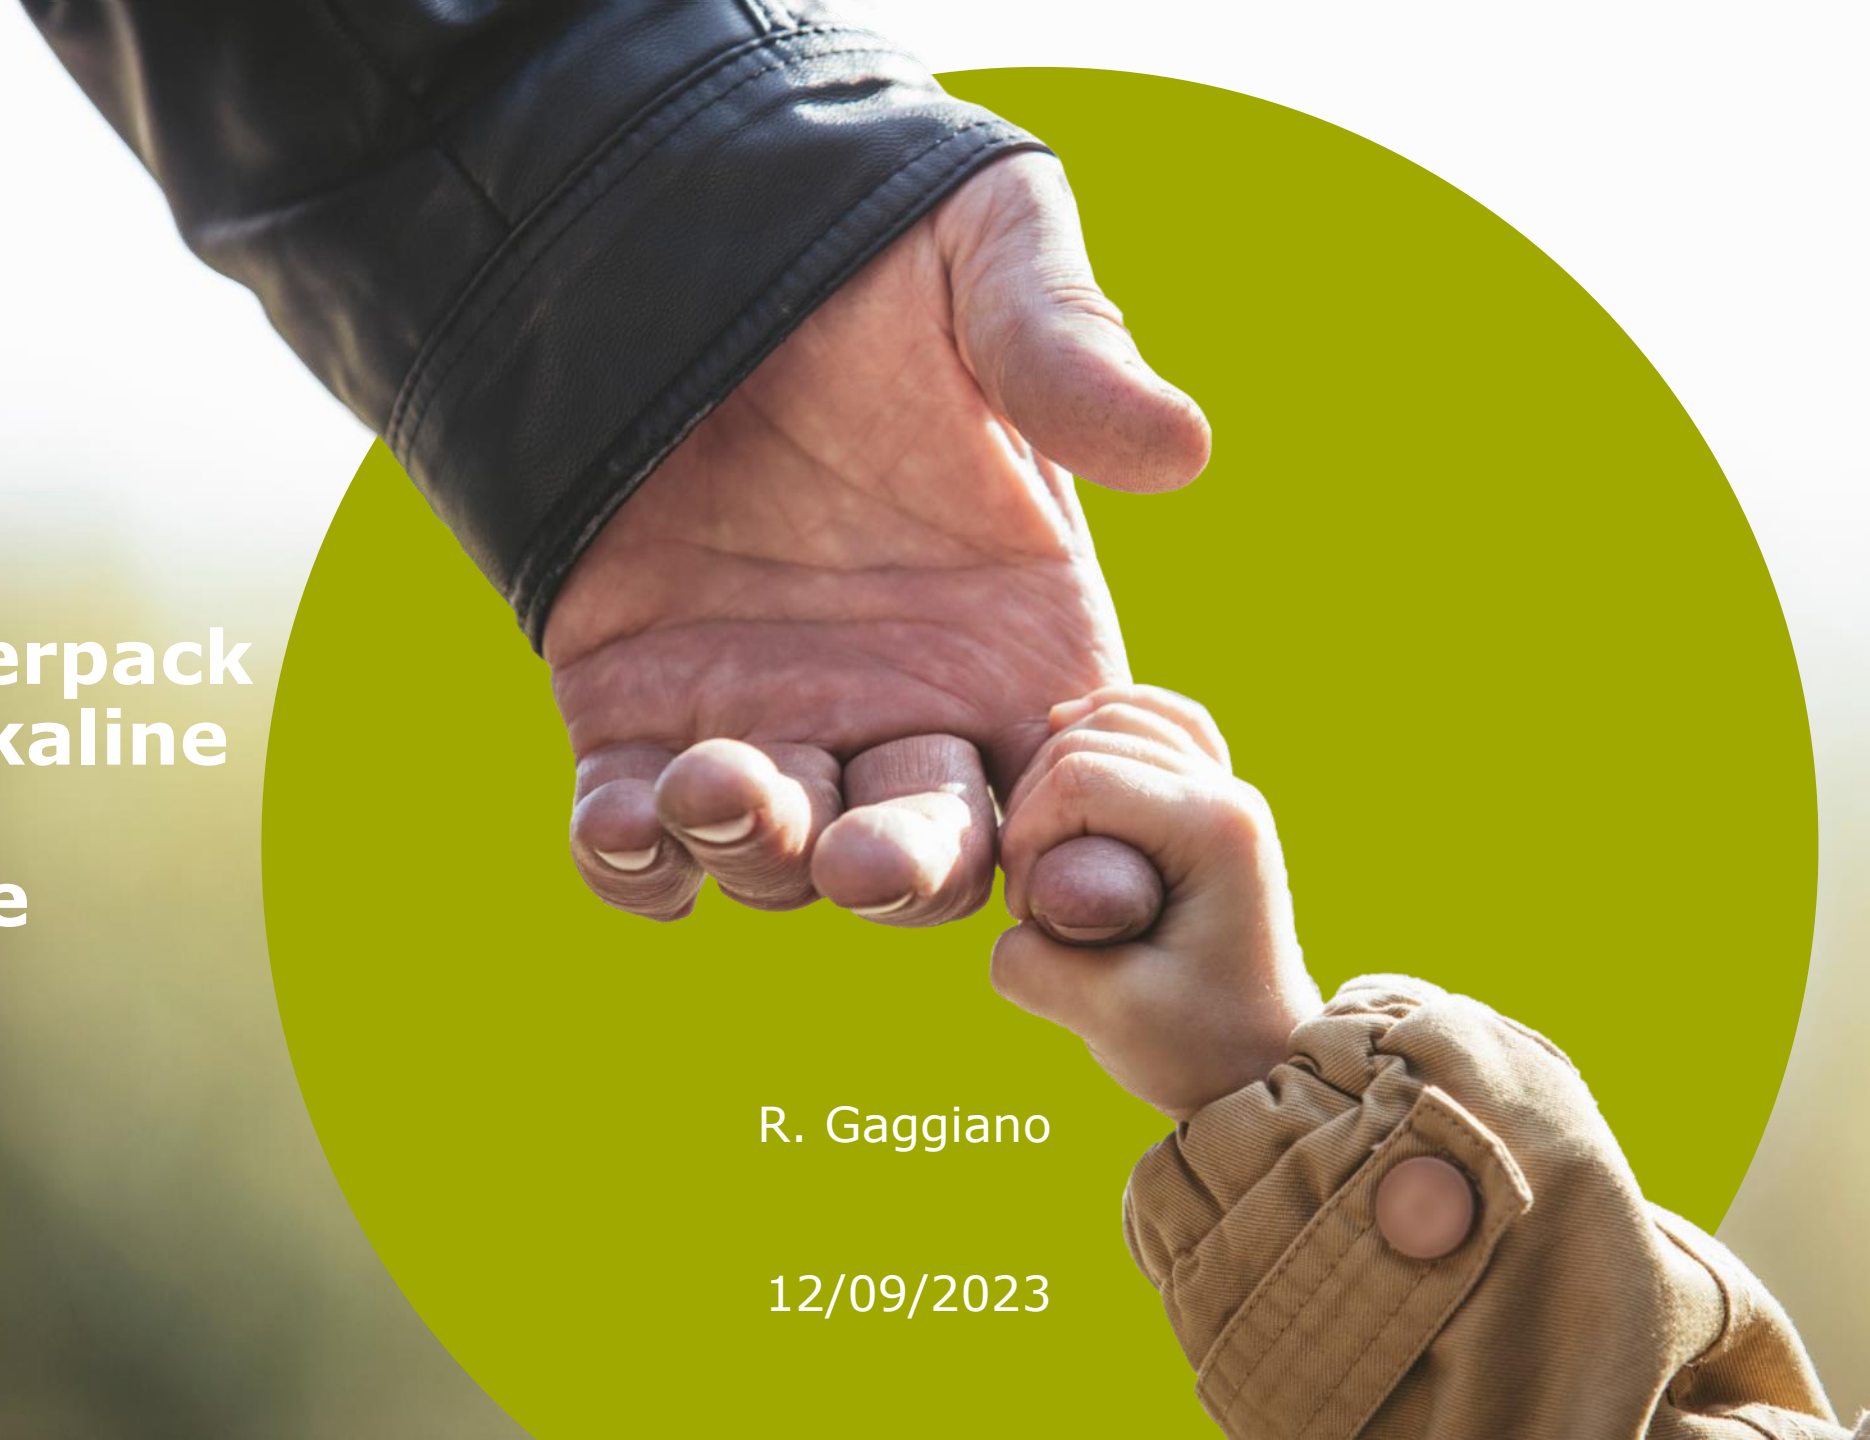

# Geological disposal concept

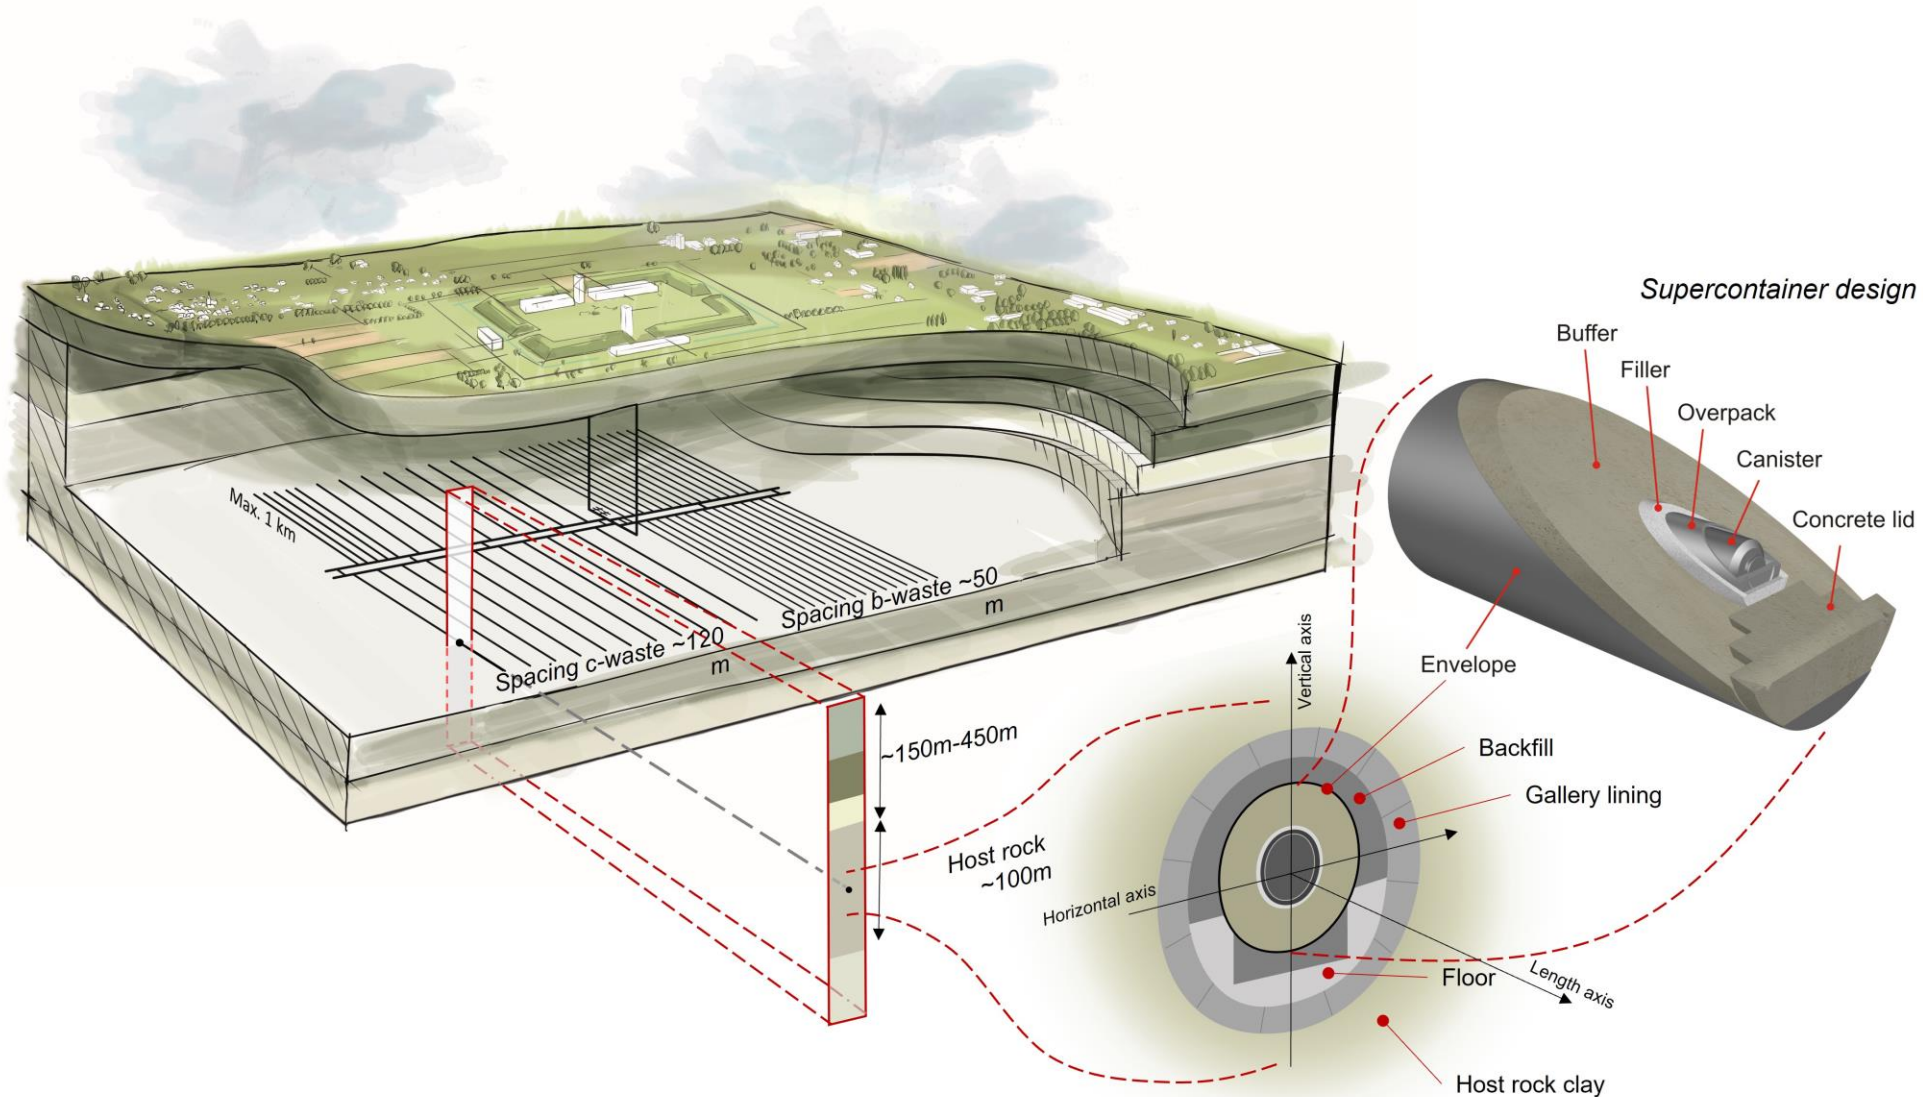

# The 'Supercontainer' design

## Reference disposal concept in Belgium

- Carbon steel **overpack** containing either vitrified HLW canisters or spent fuel assemblies
- The overpack is surrounded by a OPC-based concrete **buffer**

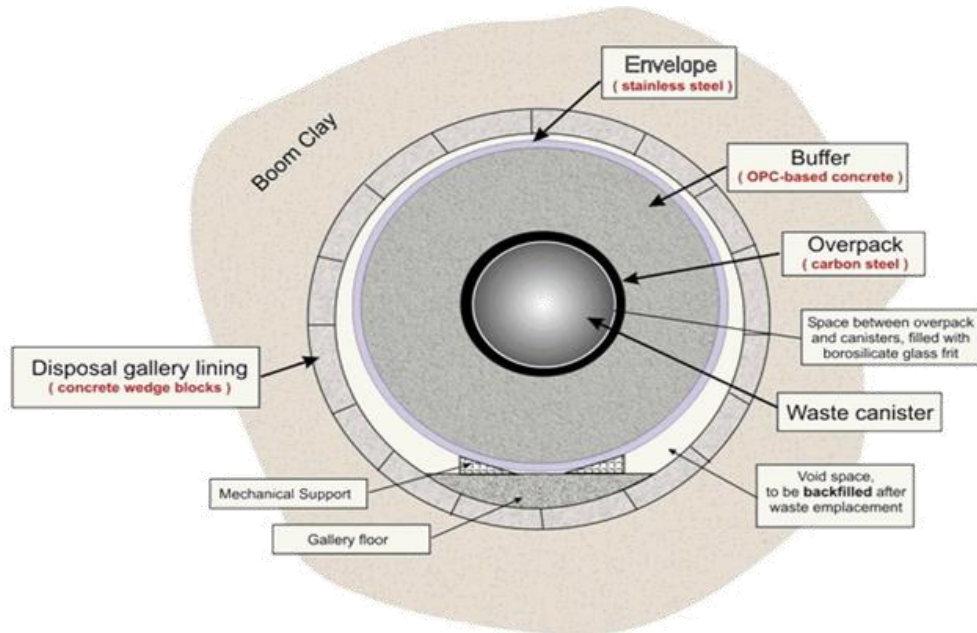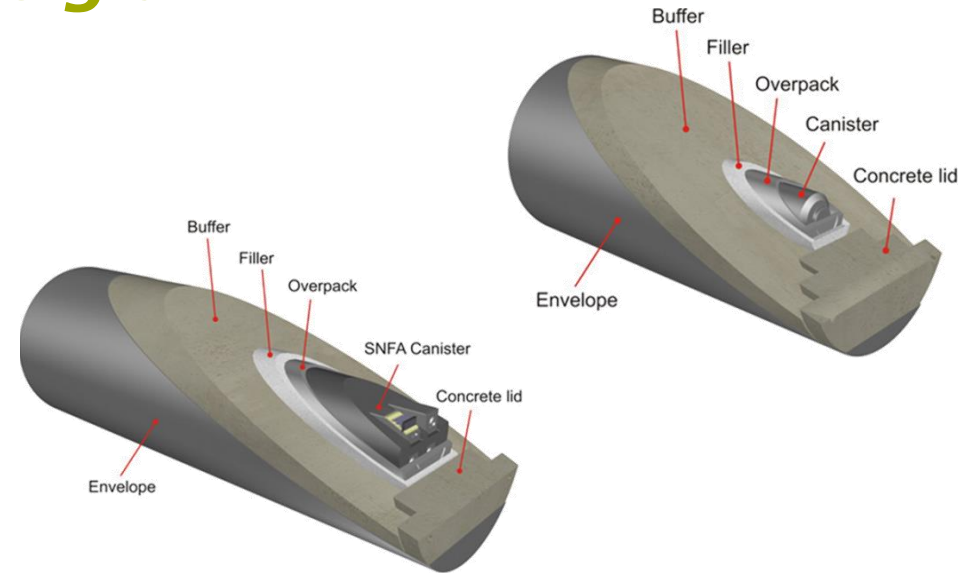

- The cylindrical cavity between the overpack and the concrete buffer is filled with a cementitious filler
- The concrete buffer is entirely encased in a stainless steel **envelope**.



Corrosion  
programme:  
RD&D  
methodology  
and research  
activities

# Contained Environment Concept

- Aim: to fix and preserve a favourable chemical environment in the immediate vicinity of the overpack for a long time, at least for the duration of the thermal phase

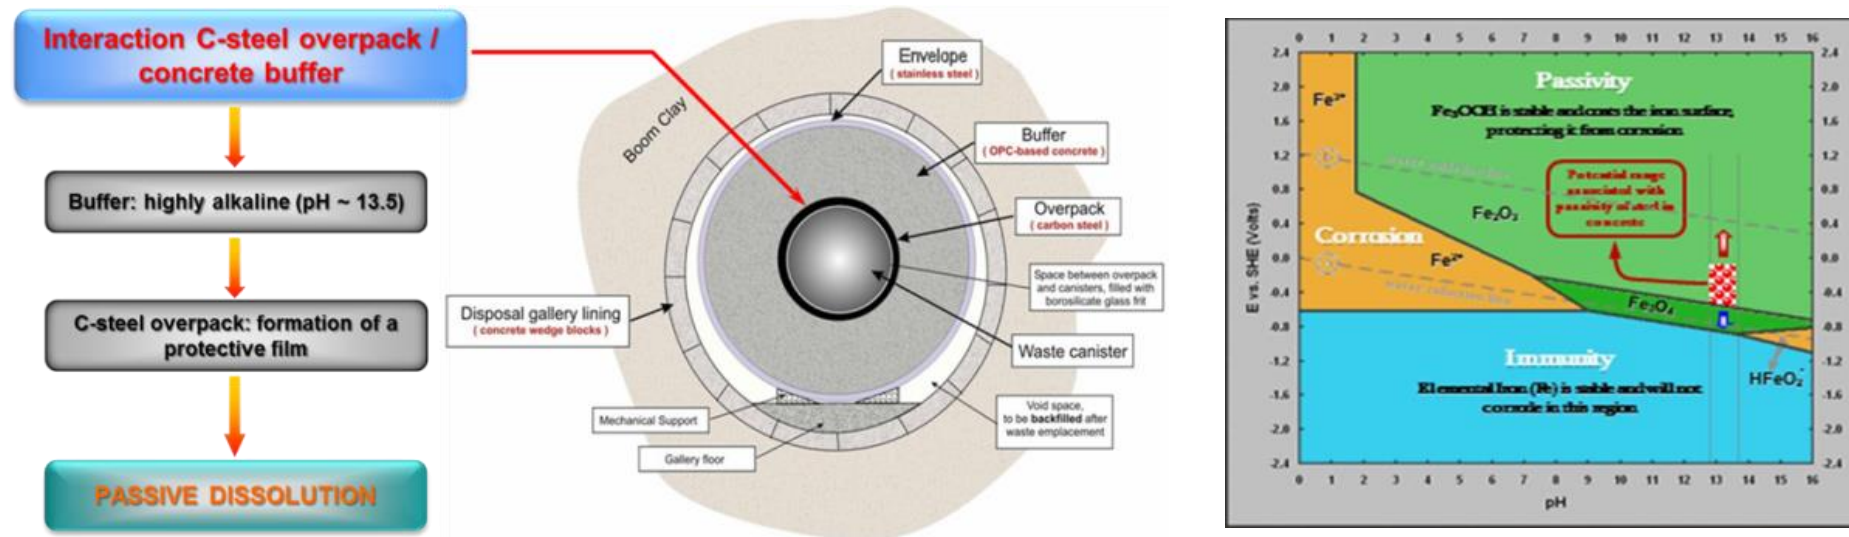

- The main goal of the ongoing RD&D corrosion studies is to **provide confidence that the integrity of the carbon steel overpack will not be jeopardized at least for the duration of the thermal phase.**

**Long-term safety function C-steel overpack**

# RD&D methodology

## Integrated 3-step approach

### 1. Development of the Corrosion Evolutionary Path

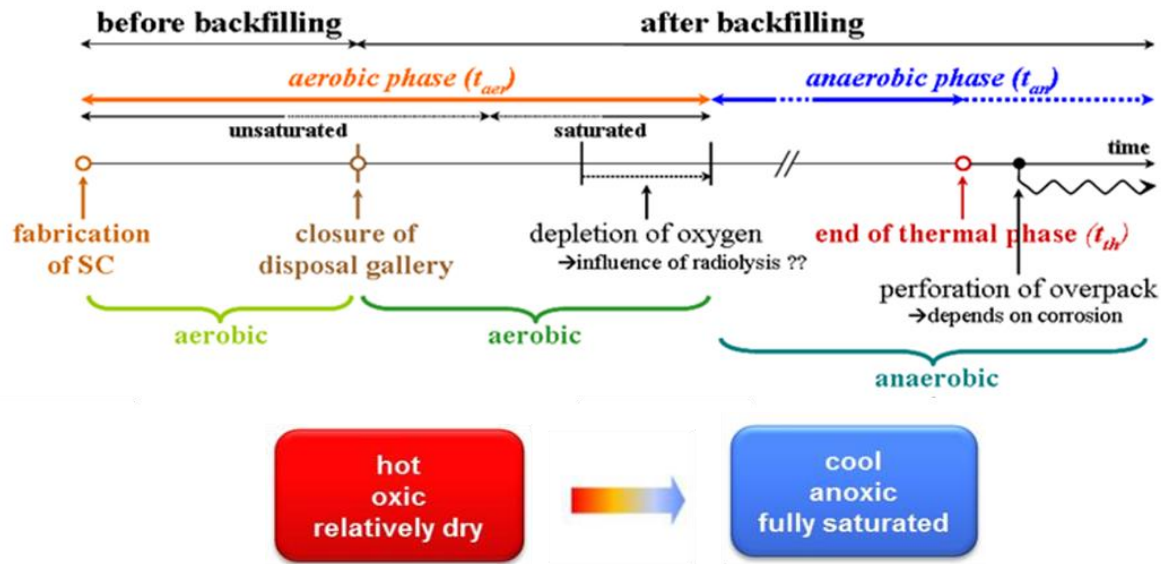

### 2. Determining reliable uniform corrosion rate data

- ◆ Reliable estimate of the uniform corrosion rate for the different phases of the CEP
- ◆ Lifetime predictions (i.e., the reduction in wall thickness in  $\mu\text{m}/\text{year}$ )

$$d_{overpack} = \sum v_i \cdot t_i$$

- ◆ Evolution of the passive film with time

### 3. Proving the validity of the 'exclusion principle'

- ◆ Any other form of corrosion cannot occur
  - ⇒ Pitting corrosion
  - ⇒ Stress corrosion cracking

# Research activities

## Uniform corrosion

- Measurement of H<sub>2</sub> generated during the anoxic corrosion of carbon steel
 
$$3Fe + 4H_2O \rightarrow Fe_3O_4 + 4H_2 \uparrow$$
- 4 independent techniques:
  - Barometric glass gas cells
  - Autoclaves equipped with pressure transducers
  - Solid-state hydrogen sensor
  - Electrochemical measurements

## Passive oxide film

- Study of the characteristics and evolution of the passive film

→ electrochemical techniques and surface analysis

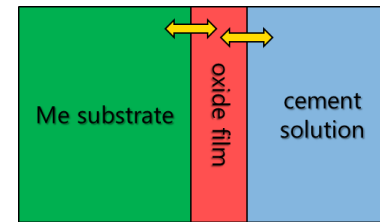

## Radiolysis of the buffer

- Modelling of the radiolysis of water in the concrete buffer
- Equilibria in solution
- Hydrogen produced by radiolysis

## Pitting corrosion

- Study of chloride pitting of carbon steel
  - Potentiodynamic polarization measurements
  - Modelling of the results and long-term prediction by means of the Point Defect Model and the Mixed Potential Model.

## Stress corrosion cracking

- Study the SCC susceptibility of plain and welded C-steel exposed to alkaline media (YCW, pH ~13.5) under anoxic conditions

→ Slow Strain Rate Tests

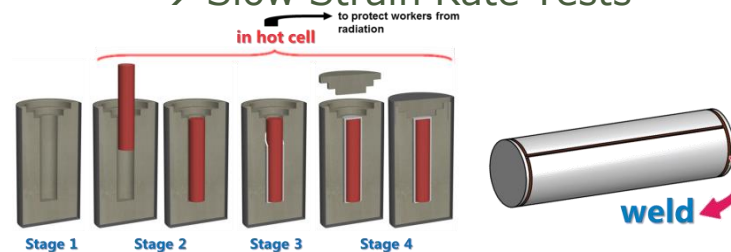

## Envelope

- Electrochemical screening of possible construction materials exposed to highly alkaline media.

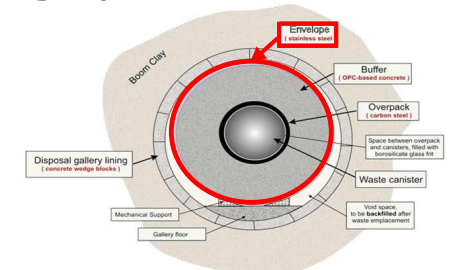





Current status  
Belgian RD&D  
corrosion  
programme

# Uniform corrosion

Results - volumetric method (Limit of detection:  $\sim 100$  nm/y)

Boundary conditions:  
[Cl<sup>-</sup>]: 100 mg/L  
[S<sup>2-</sup>]: 500 mg/L  
[S<sub>2</sub>O<sub>3</sub><sup>2-</sup>]: 100 mg/L  
T = 25°C, 50°C, 80°C  
γ = 25 Gy/h

unirradiated

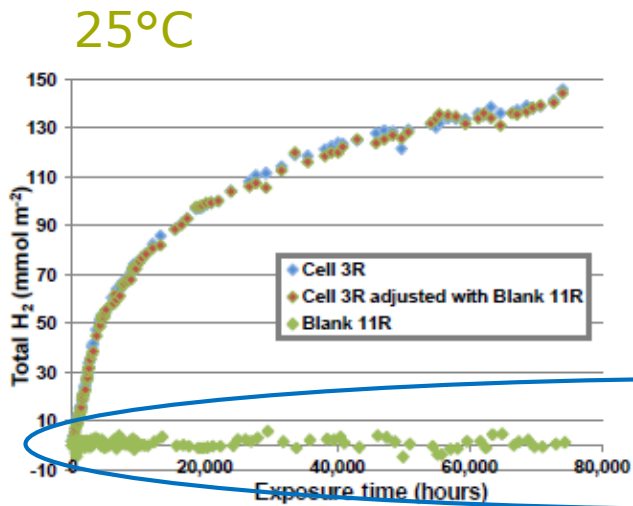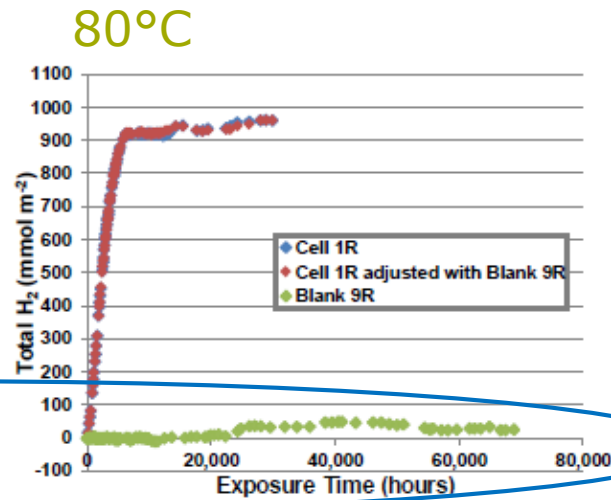

Increase in gas generation steeper in irradiated cells over initial period

no radiolysis or other degassing process

irradiated

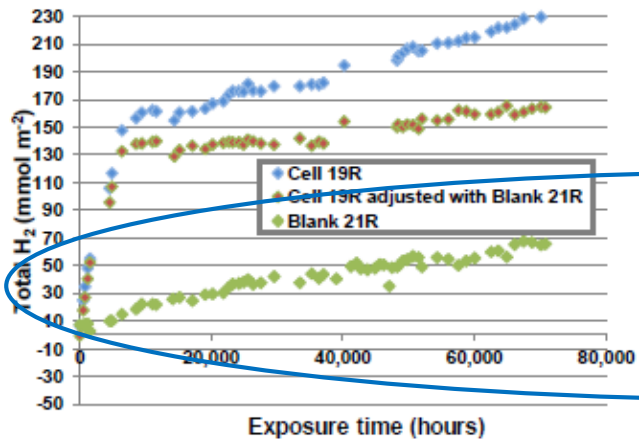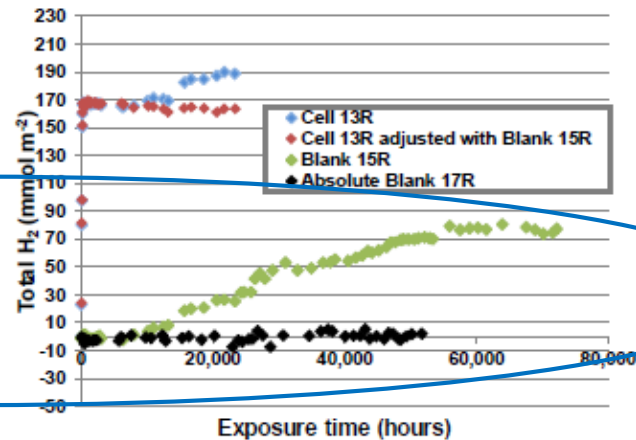

radiolysis

# Uniform corrosion

## Results - volumetric method

Boundary conditions:  
 $[Cl^-]$ : 100 mg/L  
 $[S^{2-}]$ : 500 mg/L  
 $[S_2O_3^{2-}]$ : 100 mg/L  
 $T = 25^\circ C, 50^\circ C, 80^\circ C$   
 $\gamma = 25 \text{ Gy/h}$

Pickled, 25 °C

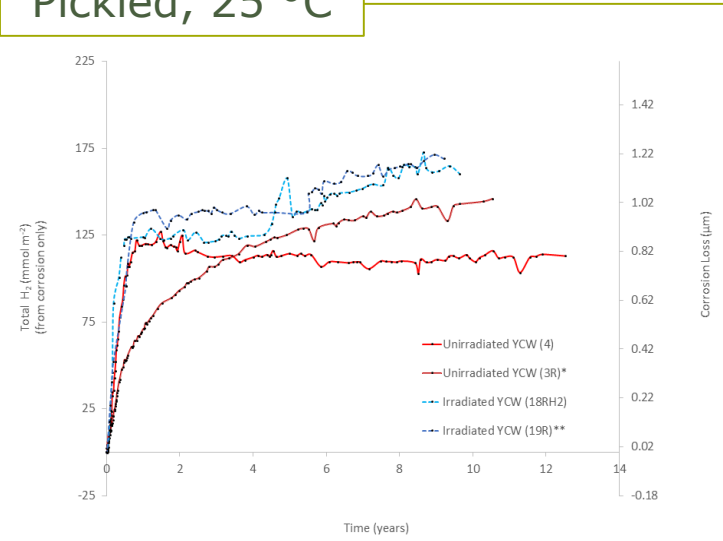

Pickled, 80 °C

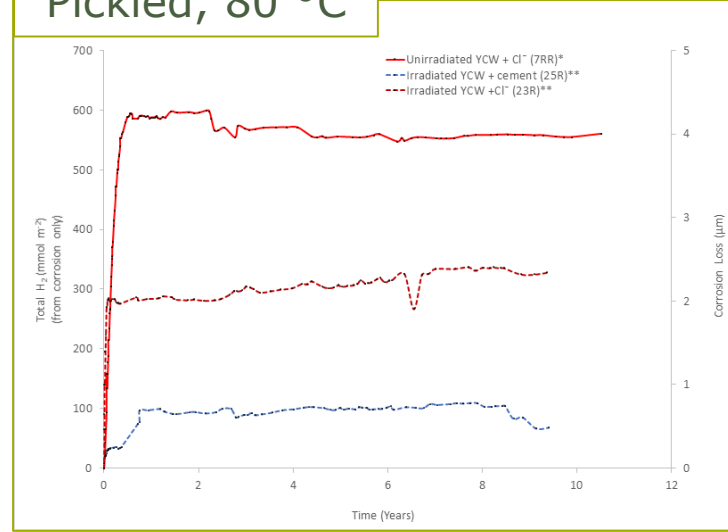

Pre-corroded, 25 °C

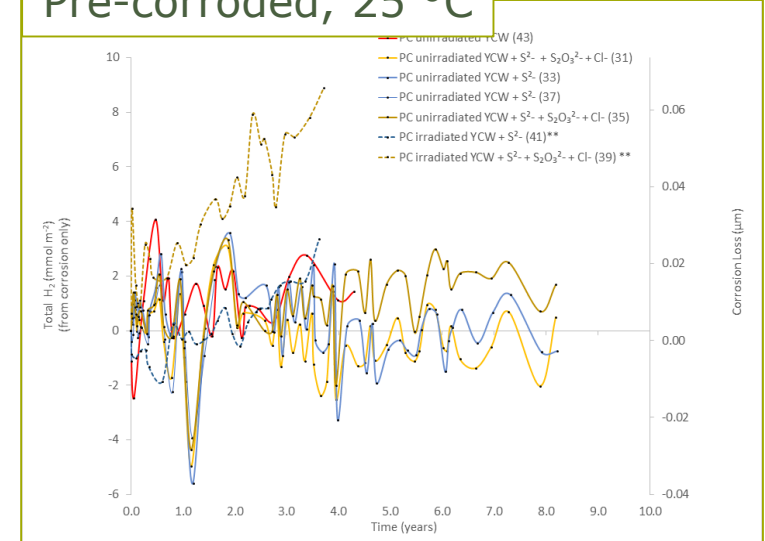

- Irradiated YCW corrosion rate past 5 years = **0.045 µm/year**
- Unirradiated YCW corrosion rate past 5 years = **0.025 µm/year**

- For all unirradiated cells the total gas generation is immeasurably small
- Irradiated YCW +  $S^{2-}$  +  $S_2O_3^{2-}$  +  $Cl^-$  corrosion rate over all 4 years = **0.013 µm/year**
- Irradiated YCW +  $S^{2-}$  corrosion rate over all 4 years < **0.01 µm/year**

- Irradiated YCW +  $Cl^-$  corrosion rate past 5 years = **0.048 µm/year**
- Steady state corrosion rate is comparable to that measured at 25 °C
- Total gas generation is greater than at 25 °C and is due to initial corrosion rate

# Uniform corrosion

## Results: autoclaves with pressure transducer

Boundary conditions:  
[Cl<sup>-</sup>]: 100 mg/L  
[S<sup>2-</sup>]: 500 mg/L  
[S<sub>2</sub>O<sub>3</sub><sup>2-</sup>]: 100 mg/L  
T = 25°C, 50°C, 80°C  
γ = 25 Gy/h

(Limit of detection: <1 nm/year)

After approximately one year's exposure the corrosion rate had dropped to less than **0.03 μm/year** (still decreasing)

Currently transferring all glass cell experiments (operating >10 years) to autoclaves.

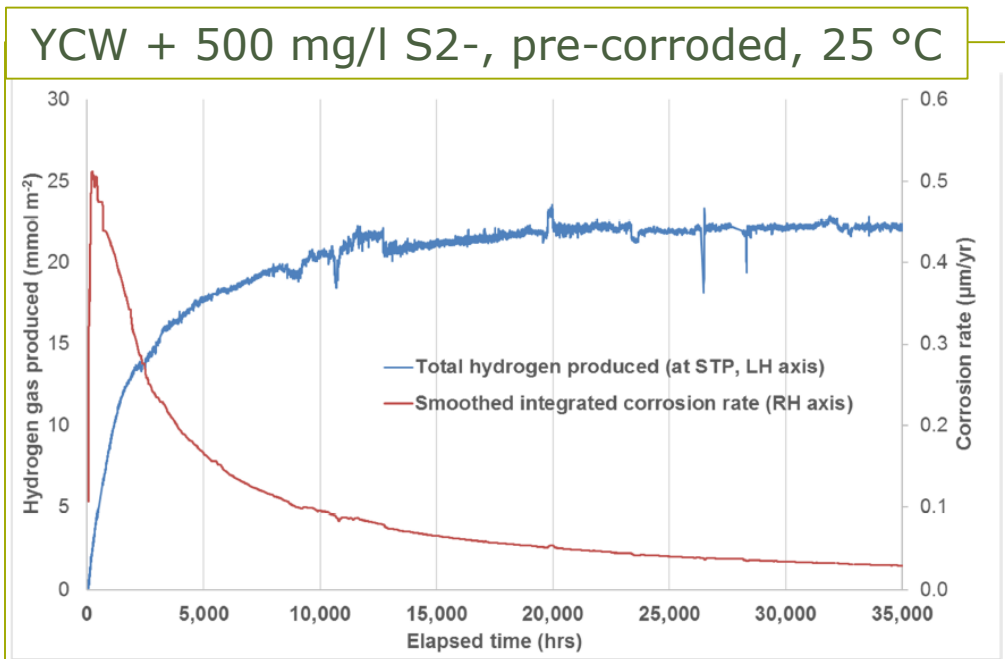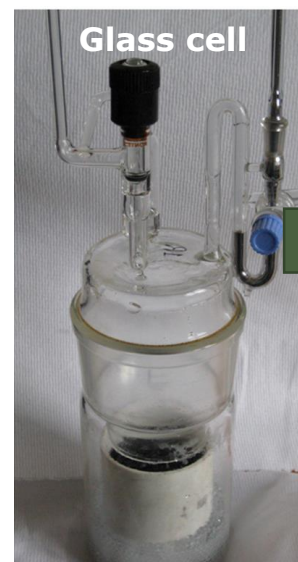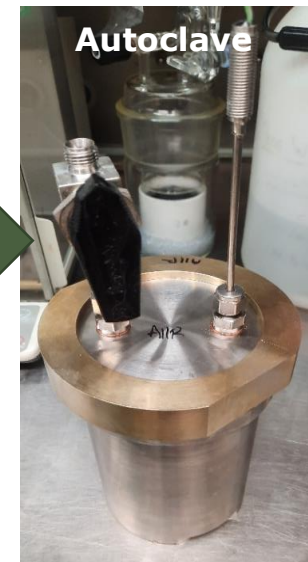



# Oxide film characterization

## Exposure to YCW

100 hour exposure

1, 000 hour exposure

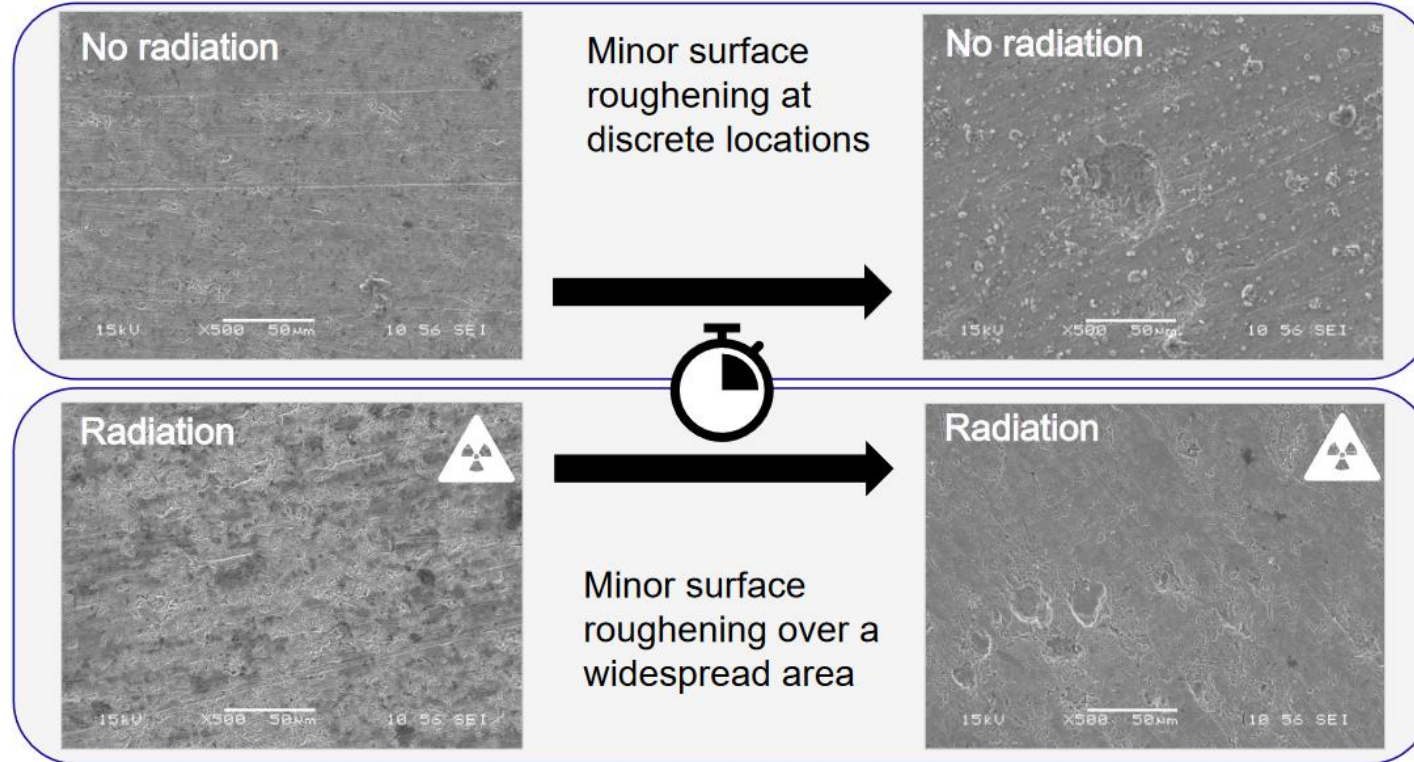

The outer surface of the film changed from mixed maghemite/ magnetite to pure magnetite from 100 to 1000 hours exposure

- In the long-term corrosion products predominantly composed of **magnetite**
- Thickness corrosion product layer  $\sim 2-3 \mu\text{m}$  (after  $\sim 5$  years)

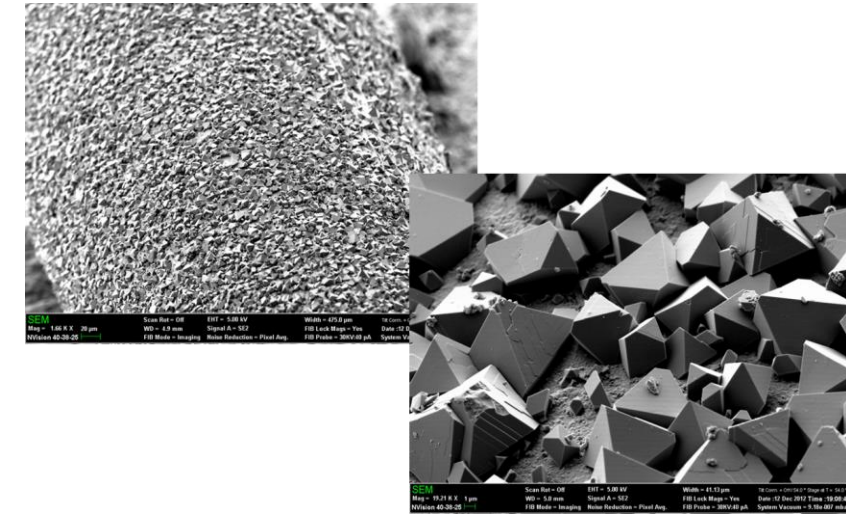

# Oxide film characterization

## Exposure to cementitious solutions

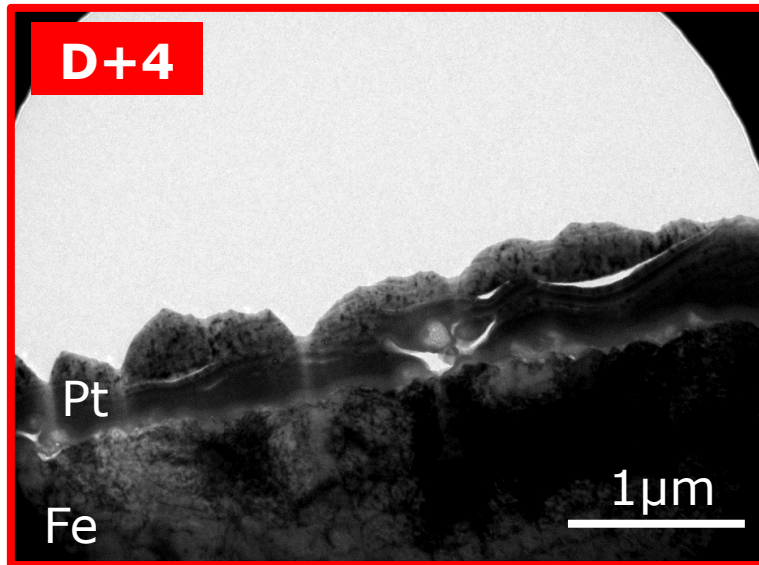

D+4

Pt

Fe

1 μm

D+4 : Layer too thin to be observed

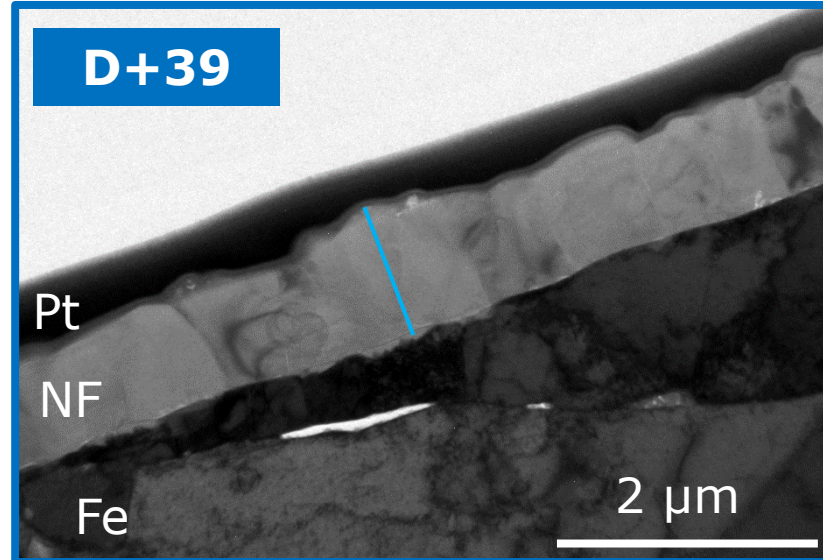

D+39

Pt

NF

Fe

2 μm

D+39 : Outer layer = 1 μm  
Inner layer = 0.1 μm  
Border at the interface.

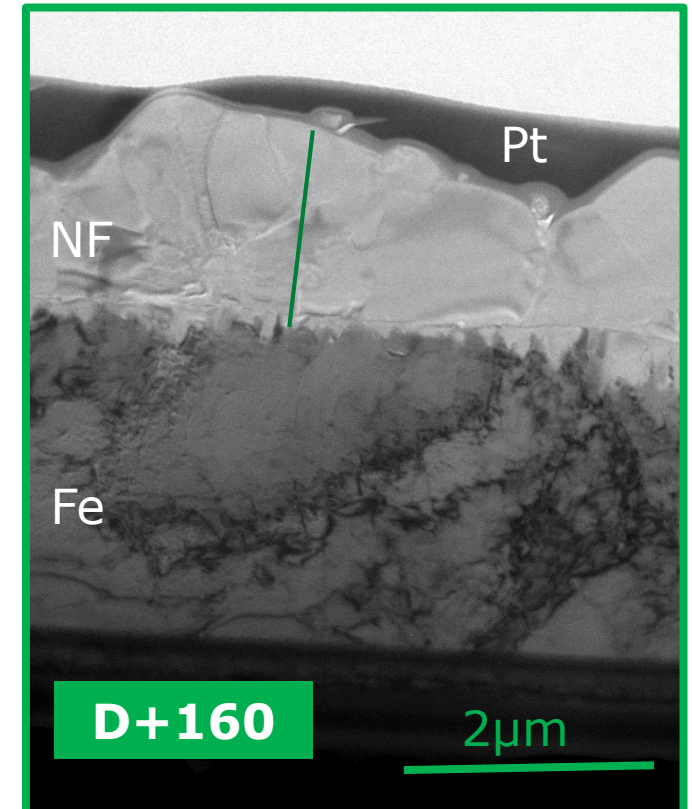

TEM measurements

D+160

NF

Fe

2 μm

D+160 : Outer layer = 1,3 μm  
Inner layer = 0,2 μm  
Border at the interface  
(nanometric)

- Bi-layer structure
- More complex composition than the corrosion products in YCW: outer and inner layer are composed of calcium, silicon, iron and oxygen (and traces of aluminum).

# Pitting corrosion

## Experimental details

### Experiments

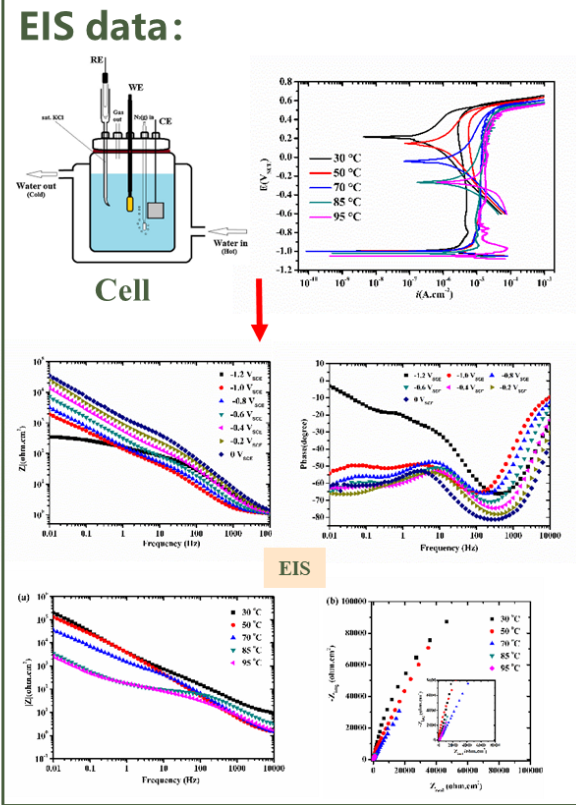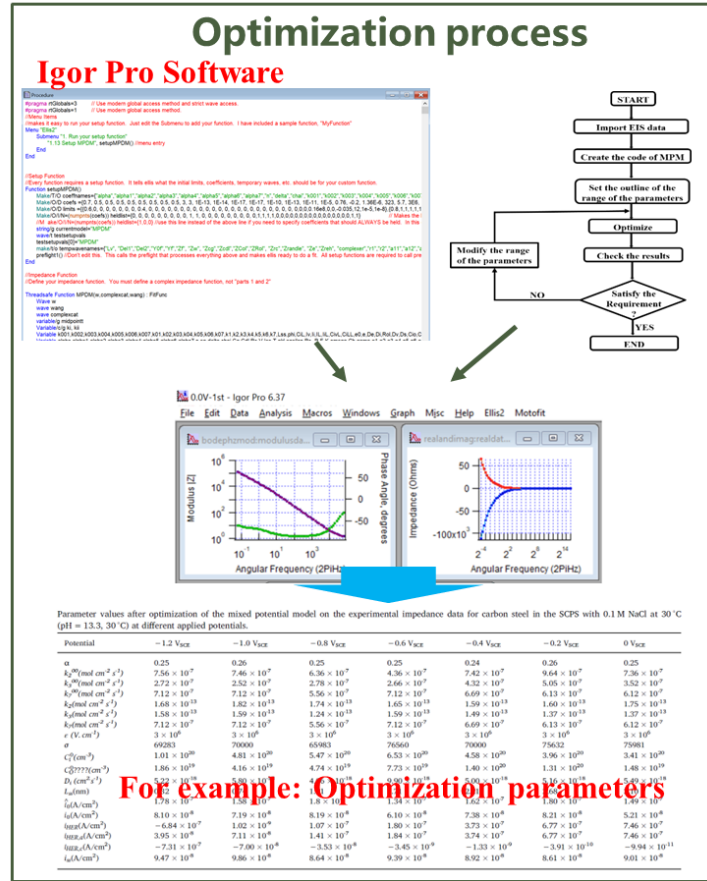

### Extrapolation of the long-term behavior by means of the MPM

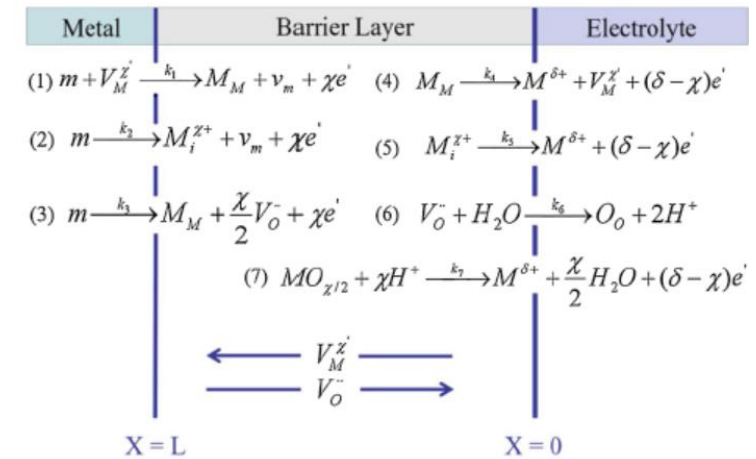

### Butler-Volmer Equation

Hydrogen electrode reaction:

$$H_2 + 2OH^- \rightleftharpoons 2H_2O + 2e^- \longrightarrow i_{HER} = \frac{k_f}{k_r} \frac{e^{2.303\eta/ba} - e^{-2.303\eta/bc}}{\frac{1}{i_0} + \frac{e^{2.303\eta/ba}}{i_{f1}} - \frac{e^{-2.303\eta/bc}}{i_{r1}}}$$

Cathodic impedance:

$$Y_{HER} = \frac{di_{HER}}{dE} = \frac{DN' - ND'}{D^2}$$

Focus on chloride pitting  
No other aggressive species are taken into account



# Pitting corrosion

## Effect of chloride

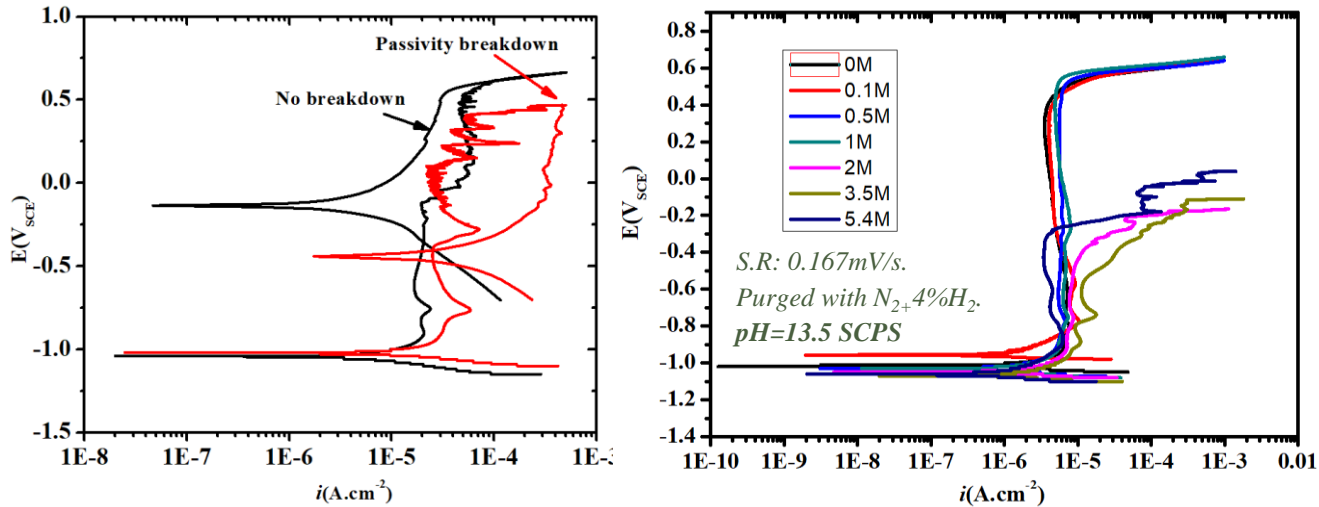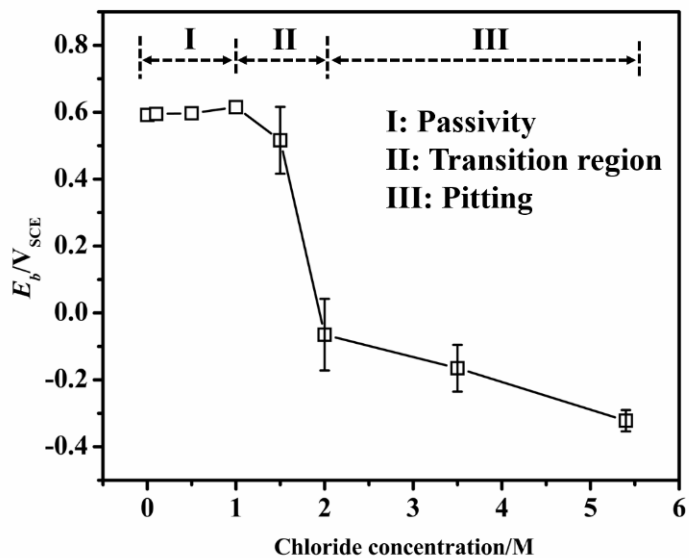

- The breakdown potential ( $E_b$ ) decreases with increasing chloride concentration.
- $Cl^- < 1M$ , no passivity breakdown occurs on carbon steel in SCPS.
- $Cl^- > 2M$ , pitting corrosion occurs. The  $E_b$  decreases with increasing chloride concentration.
- When the  $Cl^-$  of SCPS is 1.5M, passivity breakdown occurs at random, indicating that **1.5M is the  $Cl^-$  concentration for the transition of carbon steel from passivity to passivity breakdown in simplified concrete pore solution.**

# Pitting corrosion

## Artificial pit experiment

- **Experimental confirmation that, even if pits nucleate in the oxic period, they cannot maintain differential aeration during the anoxic period → no further pit activation**
- **The pit cavity becomes polarity inverted,**  
→ hydrogen evolution occurs within the cavity  
→ (metal oxidation) occurs on the external surface
- **The solution within the cavity is expected to become more alkaline** than the external environment and
- **Cations (e.g.,  $\text{Na}^+$ ) are preferentially transported into the pit and chloride ejected from the pit.**

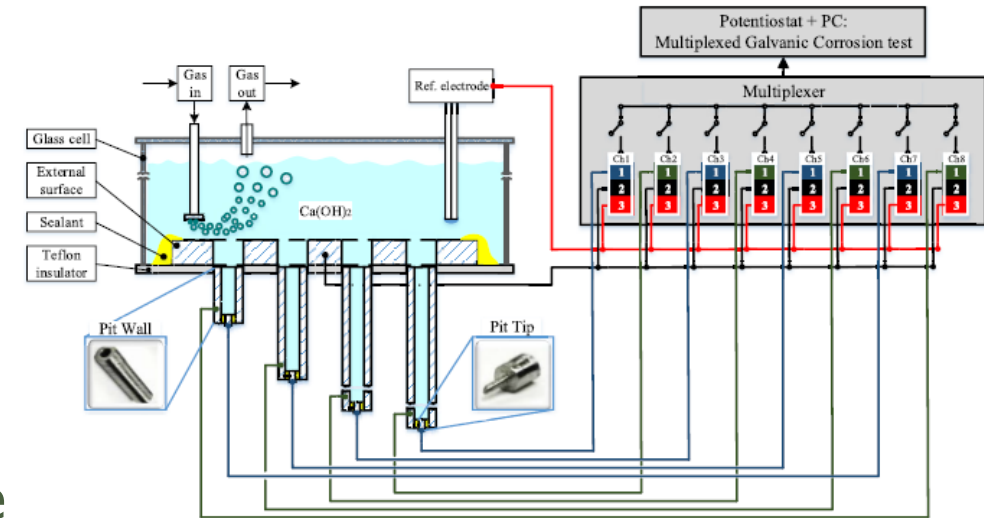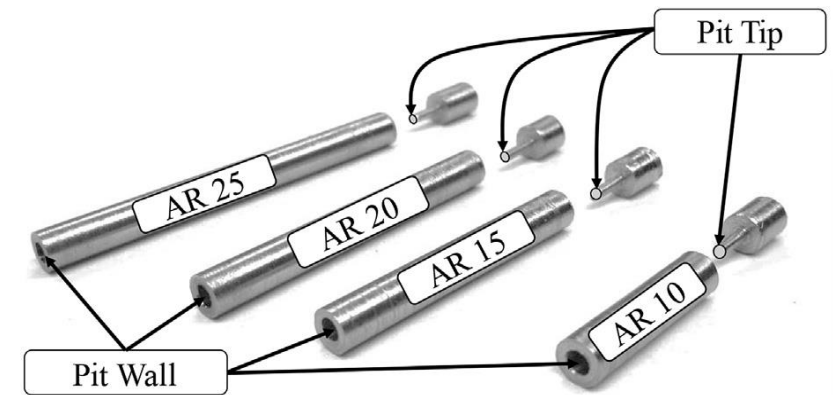

# Long-Term modelling approach

- **Deterministic Monte Carlo Simulation:** keep track of each stable pit that nucleates, propagates, and repassivates on the metal surface.
  - Simulation of the following processes
    - **Pit nucleation rate**
    - **Pit propagation rate**
    - **Probability of pit repassivation**

*Assumption:  
Pit nucleation occurs immediately after metal exposure, during the high temperature, oxic period.*

*Average depth of the deepest pit as a function of time*

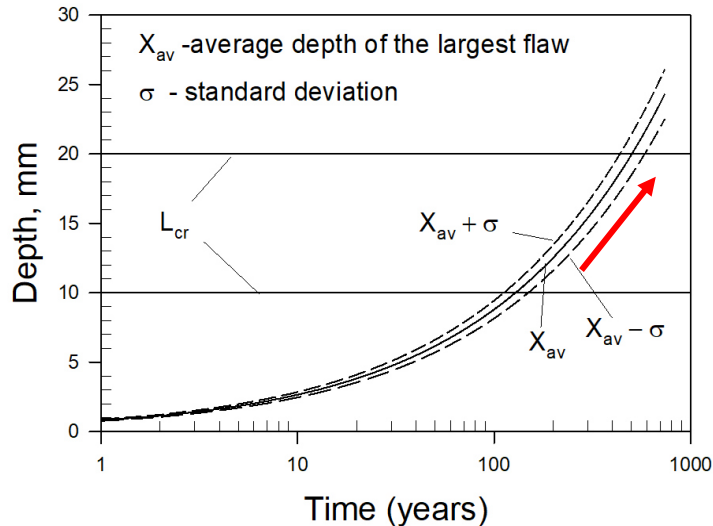

*No repassivation considered*

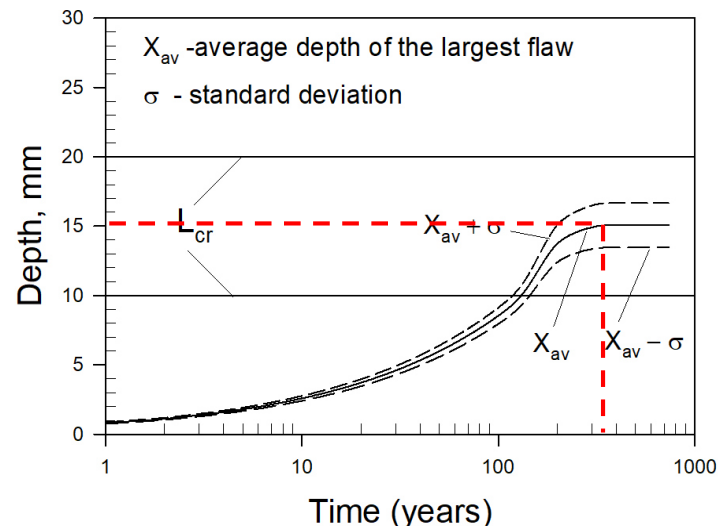

*Repassivation considered*

**Pitting represents no threat to the integrity of the overpack**  
(if corrosion allowance = 15 mm)

# Stress corrosion cracking (welds)

- SSRT tests were conducted on base and welded samples:

- ◆ Base and welded samples (SAW, MIG/MAG, RPEB)
- ◆ Anoxic conditions
- ◆  $T = 140^{\circ}\text{C}$
- ◆ Open circuit potential/applied potential
- ◆ YCW (pH 13.5)  
(in the presence or absence of aggressive species)

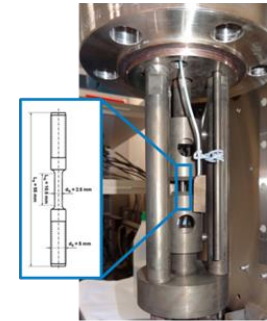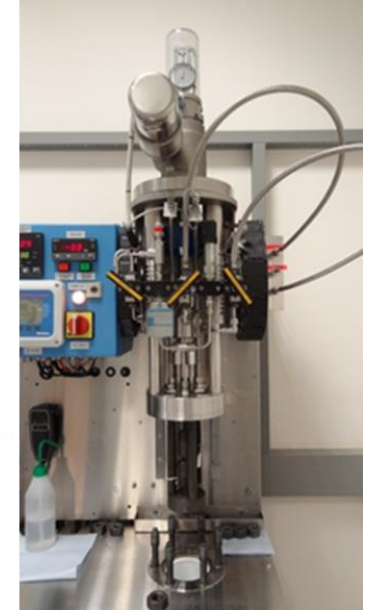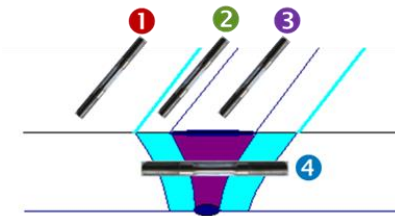

- SSRT tests at OCP and at applied potential:

- ◆ **OCP: no increased SCC susceptibility**, typical stress-strain behaviour of a ductile material.
- ◆ **Applied potential**: so far, the potential **does not seem to have a significant effect on the SCC susceptibility** and the stress-strain behaviour of carbon steel in high pH solutions.

# Stress corrosion cracking (welds)

## Typical results

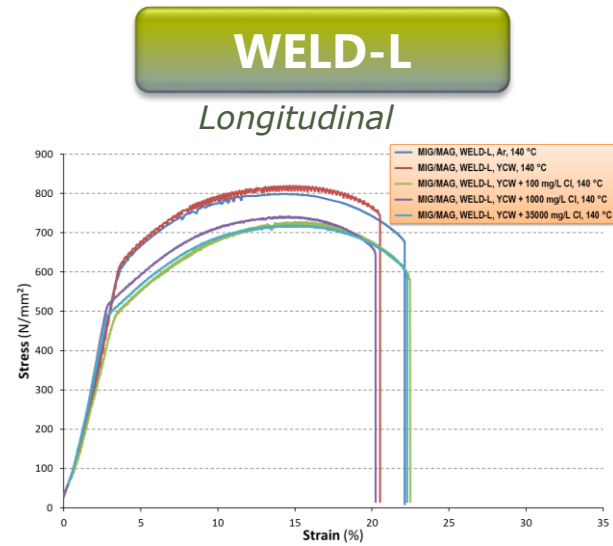

| Condition                        | YS (MPa) | UTS (MPa) | EaF (%) | TTF     |      | RA   |      |
|----------------------------------|----------|-----------|---------|---------|------|------|------|
|                                  |          |           |         | (hours) | TTFR | (%)  | RAR  |
| Ar                               | 567.0    | 798.0     | 22.1    | 124.7   |      | 47.3 |      |
| YCW                              | 605.0    | 816.0     | 20.5    | 116.0   | 0.93 | 37.8 | 0.80 |
| YCW + 100 mg/L Cl <sup>-</sup>   | 492.0    | 725.9     | 22.5    | 124.9   | 1.01 | 43.4 | 0.92 |
| YCW + 1000 mg/L Cl <sup>-</sup>  | 522.2    | 740.3     | 20.2    | 112.5   | 0.90 | 32.3 | 0.68 |
| YCW + 35000 mg/L Cl <sup>-</sup> | 491.7    | 717.7     | 22.0    | 122.2   | 0.98 | 33.9 | 0.72 |

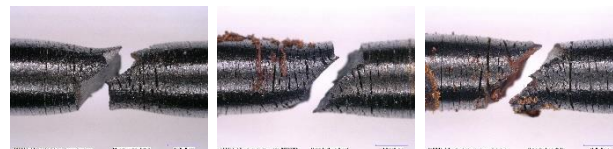

100 mg/L Cl<sup>-</sup>    1,000 mg/L Cl<sup>-</sup>    35,000 mg/L Cl<sup>-</sup>

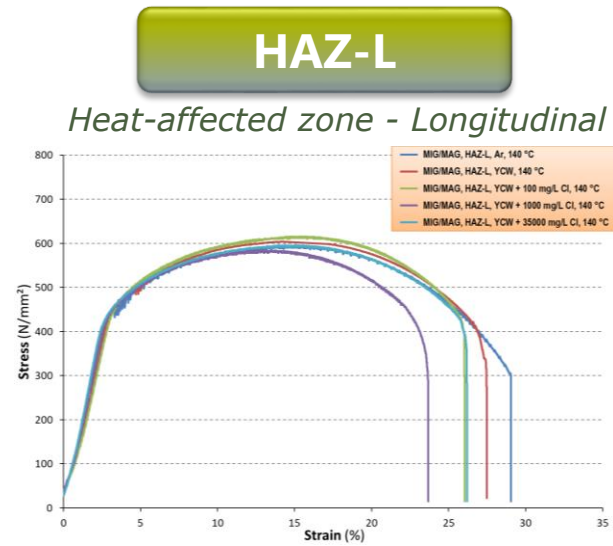

| Condition                        | YS (MPa) | UTS (MPa) | EaF (%) | TTF     |      | RA   |      |
|----------------------------------|----------|-----------|---------|---------|------|------|------|
|                                  |          |           |         | (hours) | TTFR | (%)  | RAR  |
| Ar                               | 403.0    | 592.0     | 29.1    | 163.4   |      | 82.6 |      |
| YCW                              | 424.0    | 603.0     | 27.5    | 154.6   | 0.95 | 67.3 | 0.81 |
| YCW + 100 mg/L Cl <sup>-</sup>   | 437.0    | 614.5     | 26.5    | 147.4   | 0.90 | 60.6 | 0.73 |
| YCW + 1000 mg/L Cl <sup>-</sup>  | 406.3    | 582.5     | 23.7    | 131.4   | 0.80 | 59.7 | 0.72 |
| YCW + 35000 mg/L Cl <sup>-</sup> | 404.1    | 594.5     | 26.2    | 145.5   | 0.89 | 60.6 | 0.73 |

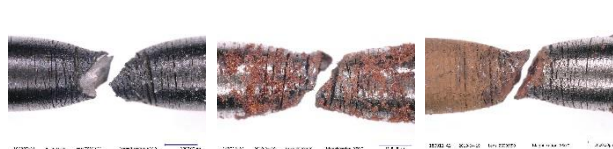

100 mg/L Cl<sup>-</sup>    1,000 mg/L Cl<sup>-</sup>    35,000 mg/L Cl<sup>-</sup>

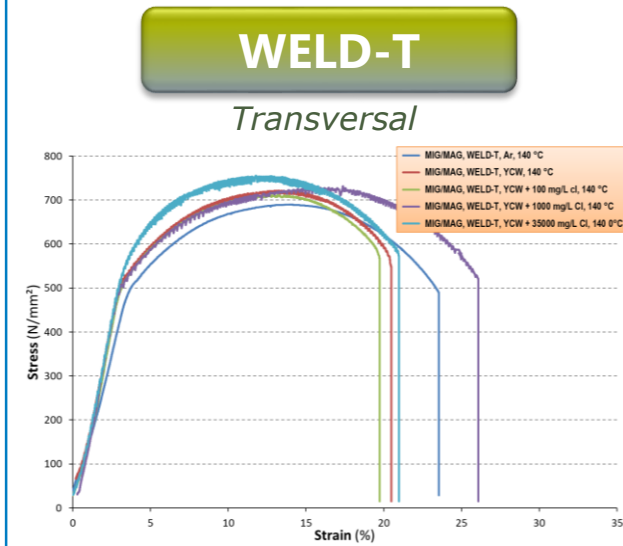

| Condition                        | YS (MPa) | UTS (MPa) | EaF (%) | TTF     |      | RA   |      |
|----------------------------------|----------|-----------|---------|---------|------|------|------|
|                                  |          |           |         | (hours) | TTFR | (%)  | RAR  |
| Ar                               | 503.0    | 690.0     | 23.5    | 133.8   |      | 64.1 |      |
| YCW                              | 507.0    | 719.3     | 21.0    | 116.6   | 0.87 | 48.6 | 0.76 |
| YCW + 100 mg/L Cl <sup>-</sup>   | 490.3    | 709.8     | 19.7    | 109.6   | 0.82 | 46.0 | 0.72 |
| YCW + 1000 mg/L Cl <sup>-</sup>  | 487.8    | 725.9     | 25.8    | 143.2   | 1.07 | 61.5 | 0.96 |
| YCW + 35000 mg/L Cl <sup>-</sup> | 529.1    | 749.6     | 21.0    | 116.6   | 0.87 | 51.9 | 0.81 |

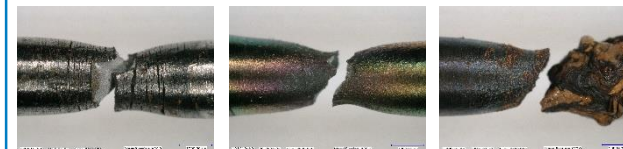

100 mg/L Cl<sup>-</sup>    1,000 mg/L Cl<sup>-</sup>    35,000 mg/L Cl<sup>-</sup>

MIG/MAG  
welding

# Stress corrosion cracking (welds)

## Typical results

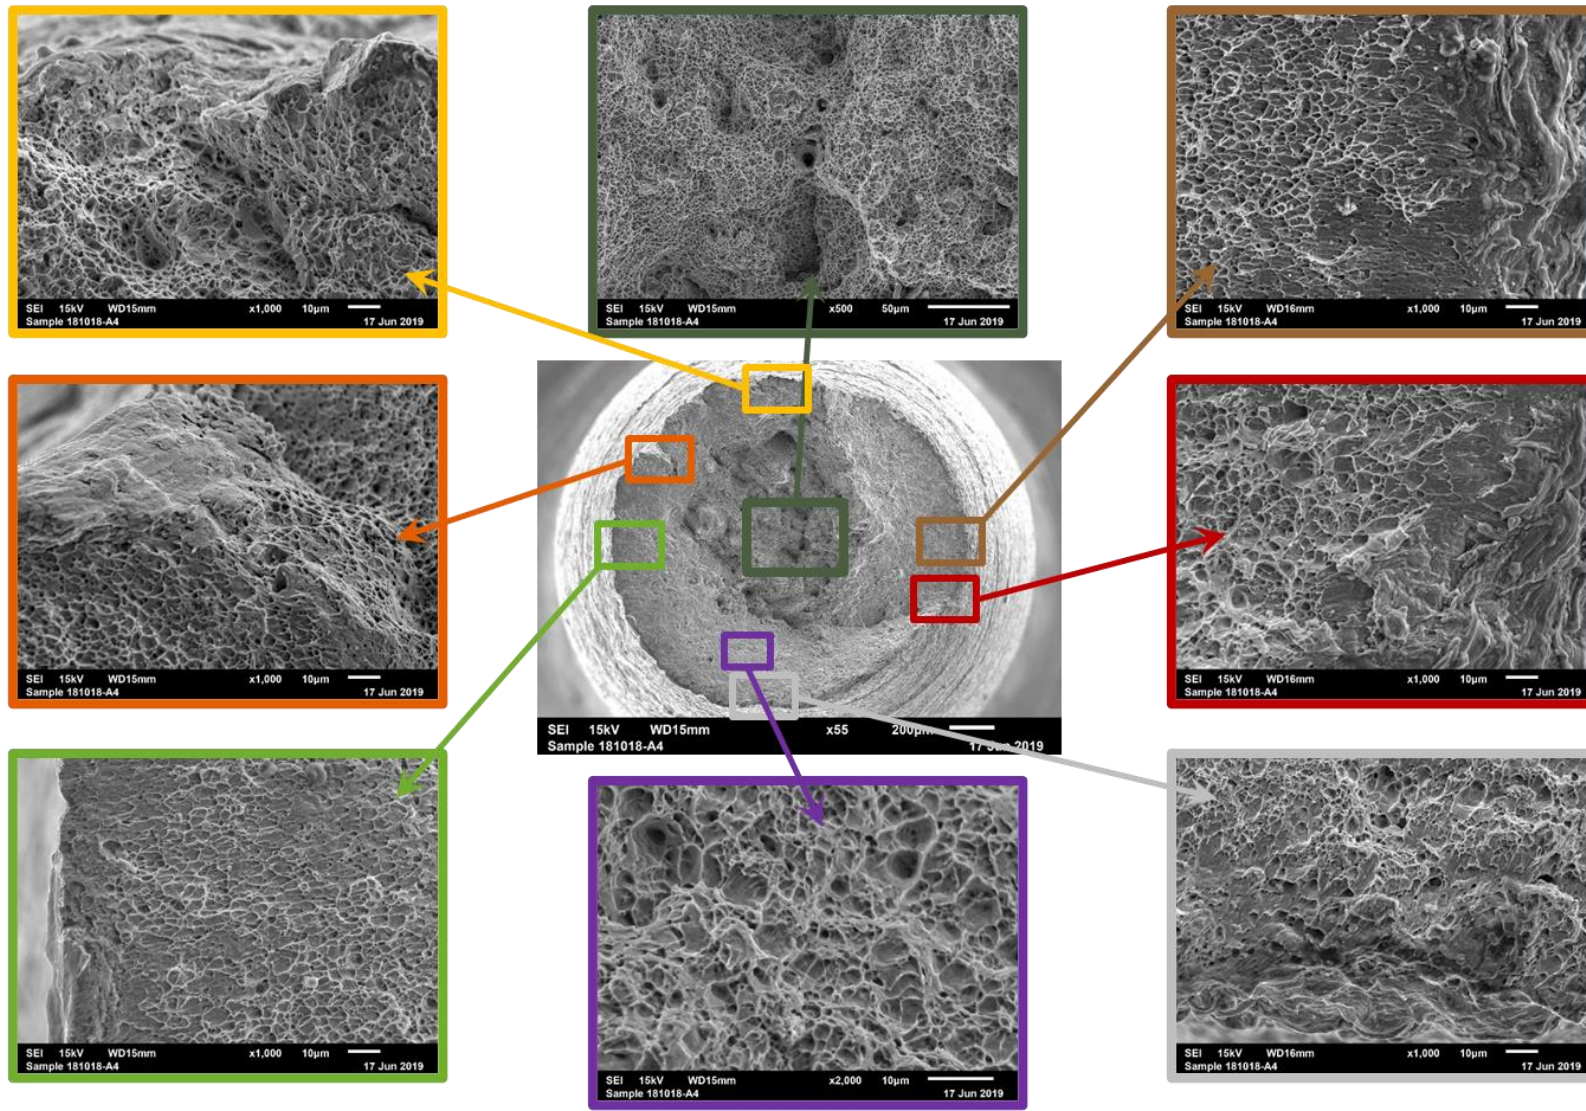

*SAW welding  
longitudinal  
1,000 mg/L*

# Envelope

## Selection of candidate materials

- List of candidate materials was studied (pitting and uniform corrosion behaviour)

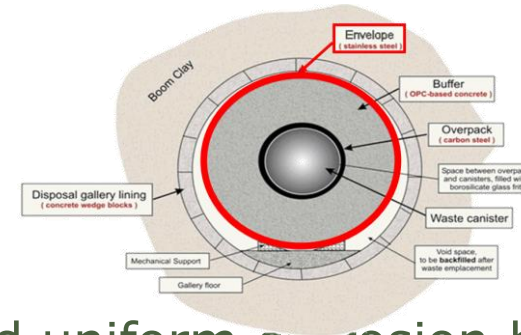

|                   | Common denomination | UNS    | Cr        | Ni        | Mo        | C    | N         | Cu      | Other                 | PREN |
|-------------------|---------------------|--------|-----------|-----------|-----------|------|-----------|---------|-----------------------|------|
| Austenitic        | → 316L              | S31603 | 16-18     | 10-14     | 2-3       | 0.03 | 0.1       | -       | -                     | 23   |
| Nickel-based      | → Alloy 825         | N08825 | 19.5-23.5 | 38-46     | 2.5-3.5   | 0.05 | -         | 1.5-3.5 | Ti: 0.6-1.2           | 28   |
| Nickel-based      | → 904L              | N08904 | 19-23     | 23-28     | 4-5       | 0.02 | -         | 1-2     | -                     | 32   |
| Super Austenitic  | → 254 SMO           | S31254 | 19.5-20.5 | 17.5-18.5 | 6-6.5     | 0.02 | 0.18-0.22 | 0.5-1   | -                     | 42   |
| Nickel-based      | → Al-6XN            | N08367 | 20-22     | 23.5-25.5 | 6-7       | 0.03 | 0.18-0.25 | 0.75    | -                     | 43   |
| Nickel-based      | → Alloy 31          | N08031 | 26-28     | 30-32     | 6-7       | 0.02 | 0.15-0.25 | 1-1.4   | -                     | 48   |
| Lean Duplex       | → LDX2304           | S32304 | 21.5-24.5 | 3-5.5     | 0.05-0.6  | 0.03 | 0.05-0.2  | -       | -                     | 22   |
| Duplex            | → DX2205            | S31803 | 21-23     | 4.5-6.5   | 2.5-3.5   | 0.03 | 0.08-0.2  | -       | -                     | 31   |
| Super Duplex      | → SDX2507           | S32750 | 24-26     | 6-8       | 3-5       | 0.03 | 0.24-0.32 | 0.5     | -                     | 38   |
| Super Duplex      | → SDX100            | S32760 | 24-26     | 6-8       | 3-4       | 0.03 | 0.2-0.3   | 0.5-1   | W:0.5-1               | 37   |
| Nickel-based + Mo | → C-276             | N10276 | 15.5-16.5 | Ca. 57    | 15-17     | 0.01 | -         | -       | W:3.5-4.5<br>Fe: 4-7  | -    |
| Nickel-based + Mo | → C-4               | N06455 | 16        | Ca. 65    | 16        | 0.01 | -         | -       | Fe:2                  | -    |
| Nickel-based + Mo | → C-22              | N06022 | 20-22.5   | Ca. 56    | 12.5-14.5 | 0.01 | -         | -       | W: 2.5-3.5<br>Fe: 2-6 | -    |
| Nickel-based + Mo | → C-2000            | N06200 | 22-24     | Ca. 67    | 15-17     | 0.01 | -         | 1.3-1.9 | Fe:3                  | -    |
| Zirconium         | → Zr702             | R60702 | -         | -         | -         | -    | -         | -       | Hf: 2<br>Zr: Bal.     | -    |

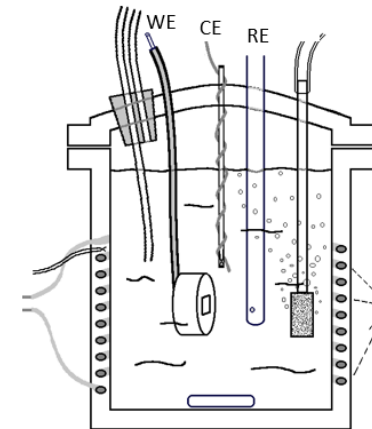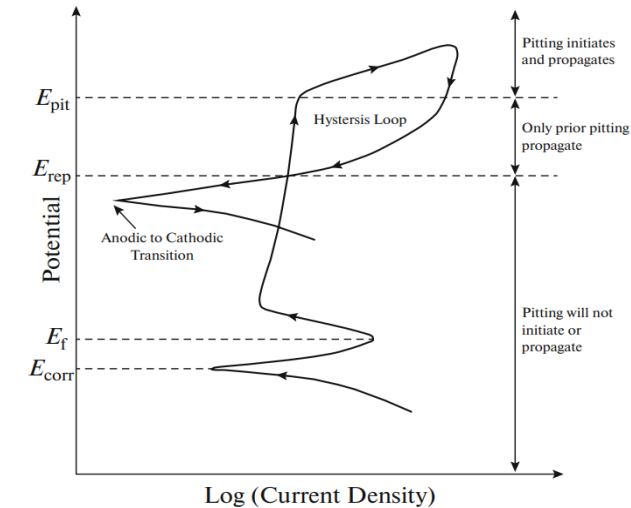

- Super austenitic 254 SMO = best candidate for pitting corrosion**
- Corrosion rate of stainless steel in cement (CEM I): very low, not measurable. (< 0.01 nm/year)**



# Conclusions and open questions



# Conclusions and open questions

## ■ Uniform corrosion:

- ◆  $V_{CORR}$ , volumetric method: 10 - 48 nm/year
- ◆  $V_{CORR}$ , pressure transducer = 20 - 30 nm/year
- ◆  $V_{CORR}$ , hydrogen sensor = 0.03 - 10 nm/year

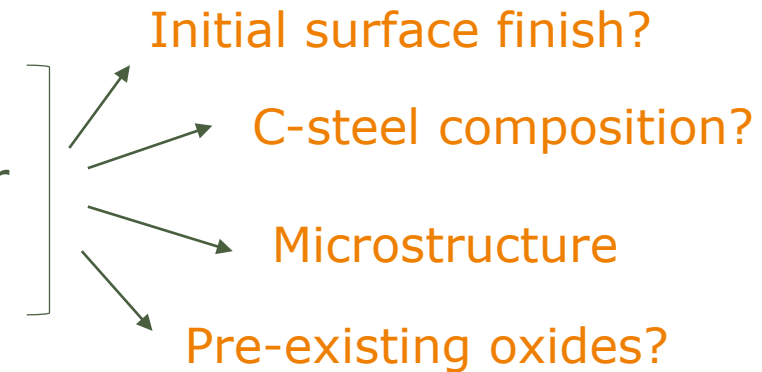

## ■ Pitting corrosion:

- ◆ Pits (due to chloride) cannot propagate under the expected conditions in the supercontainer
- ◆ Pits cannot reactivate during the anoxic period

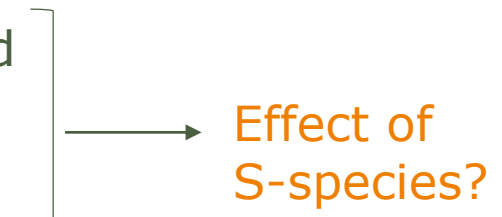

## ■ Stress corrosion cracking

- ◆ Currently no indication of increased susceptibility

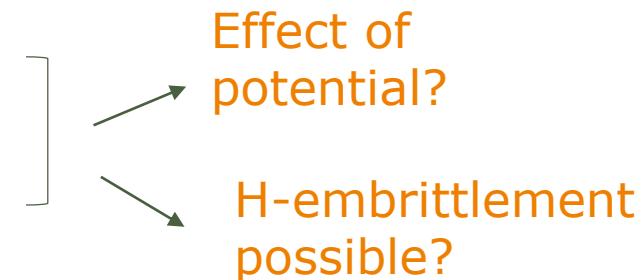

# Alternative solutions?

- ONDRAF/NIRAS currently keeps a technological eye on alternative canister material solutions

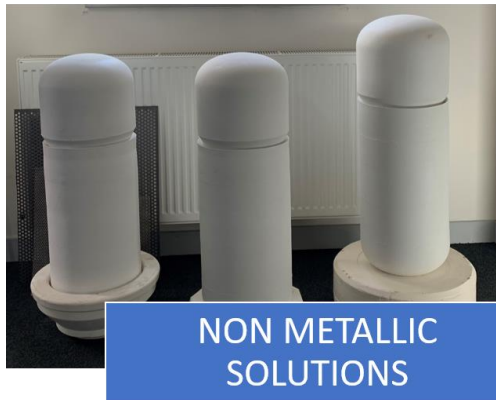

- ◆ *Ceramic Materials and Coatings*

- Bulk materials:  $\text{SiO}_2/\text{Al}_2\text{O}_3$  & SiC-Cr
- Coatings:  $\text{TiO}_2$  & CrN

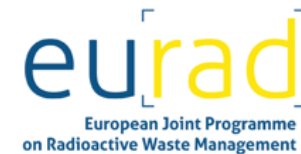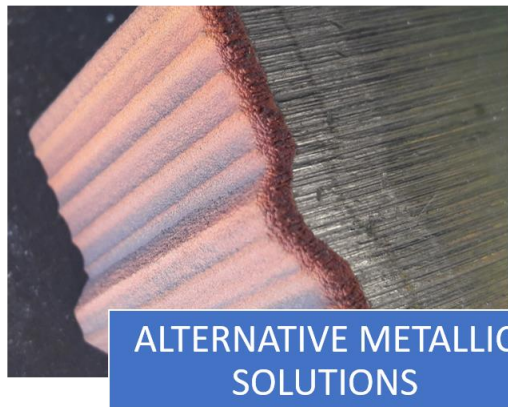

- ◆ *Metallic materials and coatings*

- Bulk materials: Cu alloys
- Coatings: Cu, Ti, Cr,  $\text{Cu}/\text{Al}_2\text{O}_3$
